# Supplementary material
Source: publisher site journal article supplement (https://www.dovepress.com/article/290655)
Supplement: Supplementary file 1 [file get_supplementary_file.php]

**Table S1** Zone diameter interpretive standards for*S. aureus* from CLSI 2015

| Antimicrobial agents | Disk Content | Zone diameter breakpoints (nearest whole mm) | | |
| --- | --- | --- | --- | --- |
| Susceptible | Intermediate | Resistant |
| Penicillin | 10 units | ≥29 | - | ≤28 |
| Trimethoprim-sulfamethoxazole | 25 µg | ≥16 | 11-15 | ≤10 |
| Clindamycin | 2 µg | ≥21 | 15-20 | ≤14 |
| Erythromycin | 15 µg | ≥23 | 14-22 | ≤13 |
| Tetracycline | 30 µg | ≥19 | 15-18 | ≤14 |
| Cefoxitin | 30 µg | ≥22 | - | ≤21 |
| Chloramphenicol | 30 µg | ≥18 | 13-17 | ≤12 |
| Rifampin | 5 µg | ≥20 | 17-19 | ≤16 |
| Quinupristin-dalfopristin | 15 µg | ≥19 | 16-18 | ≤15 |
| Gentamicin | 10 µg | ≥15 | 13-14 | ≤12 |
| Ciprofloxacin | 5 µg | ≥21 | 16-20 | ≤15 |
| Linezolid | 30 µg | ≥21 | - | ≤20 |
